# Supplementary material
Source: publisher site journal article supplement (https://www.spandidos-publications.com/2595/downloadSupplementary)
Supplement: Supplementary file 1 [file downloadSupplementary]

## Sheet: Table S2
Table SII. Clinical information of all the patients with brain metastasis.
Case no.	gender(1 male,2=female)	Age of onset	Survival status ( 1 death, 0 alive)	primary site （1 lung，2 others）
1	2	60	1	1
2	2	63	1	1
3	2	61	0	1
4	2	60	1	2
5	2	64	1	2
6	2	61	1	2
7	2	47	0	1
8	2	36	1	2
9	2	51	1	1
10	2	58	1	2
11	2	70	1	1
12	2	62	1	1
13	2	45	1	1
14	1	66	1	1
15	1	53	1	2
16	1	51	1	2
17	2	42	1	2
18	1	63	1	1
19	1	72	1	1
20	1	63	1	2
21	1	56	1	2
22	1	73	1	2
23	2	53	1	1
24	2	70	1	1
25	2	60	1	2
26	1	42	1	1
27	1	37	1	1
28	2	55	1	1
29	2	52	1	2
30	1	62	1	2
31	1	60	0	1
32	1	40	1	1
33	1	44	1	1
34	1	57	1	1
35	1	49	1	1
36	1	51	1	1
37	1	57	1	1
38	1	64	1	2
39	1	36	1	1
40	1	57	0	1
41	1	56	1	2
42	1	53	1	2
43	2	58	1	1
44	1	72	1	1
45	2	36	1	2
46	1	50	1	1
47	1	44	1	1
48	1	67	1	1
49	1	43	1	1
50	1	64	1	1
51	1	61	1	2
52	1	58	1	1
